# Supplementary material for: Directed Formation of DNA Nanoarrays through Orthogonal Self-Assembly
Source: PubMed Central journal article supplement (PMC6264196; doi:10.3390/molecules16064912), 2011-06-15

Supporting Information

## Directed formation of DNA Nanoarrays through orthogonal self-assembly

Jonathan R. Burns, Jurgita Zekonyte, Giuliano Siligardi, Rohanah Hussain, and Eugen Stulz

TEM pictures of DNA:

Control system **2•3** (left), in the presence of Zn(II) (middle) and Ni(II) (right).

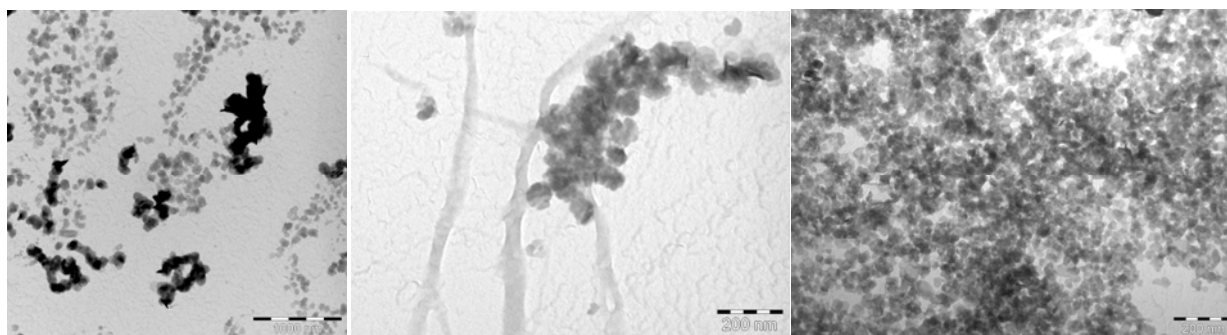

Terpyridine system **2t•3t** in the absence of Zn(II)

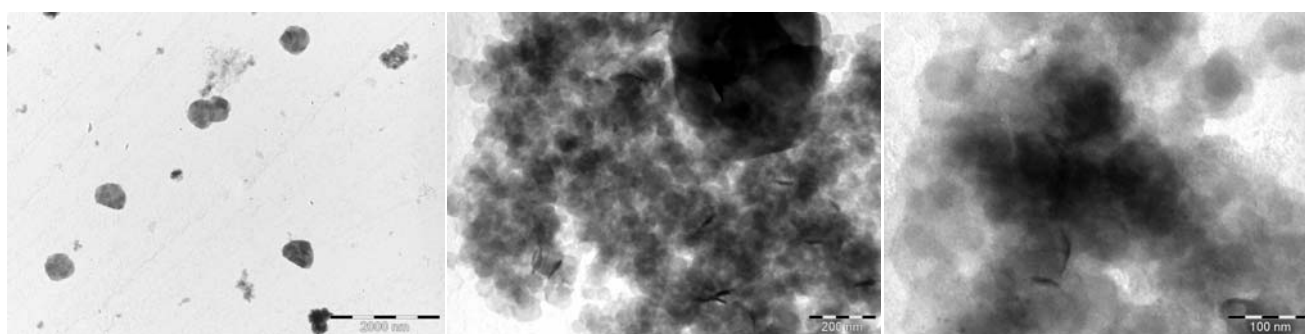

Terpyridine system **2t•3t** in the presence of Zn(II) (left, middle) and Ni(II) (right)

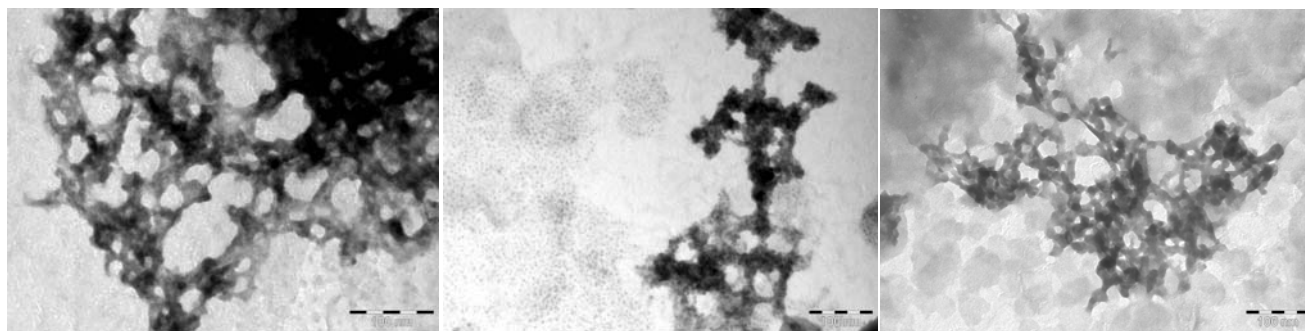

AFM pictures of DNA:

Control system **2•3** in the absence of Zn(II)

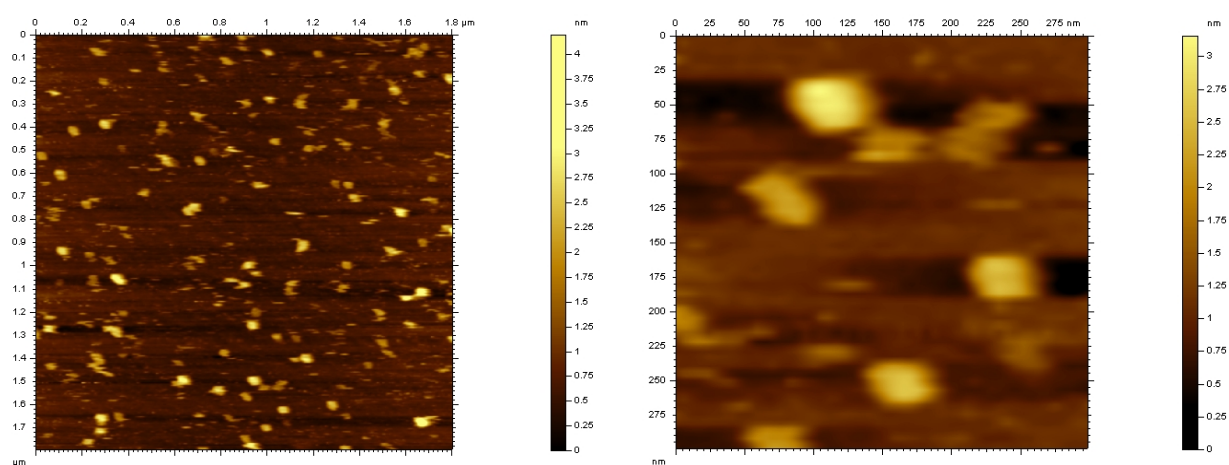

Control system **2•3** in the presence of Zn(II)

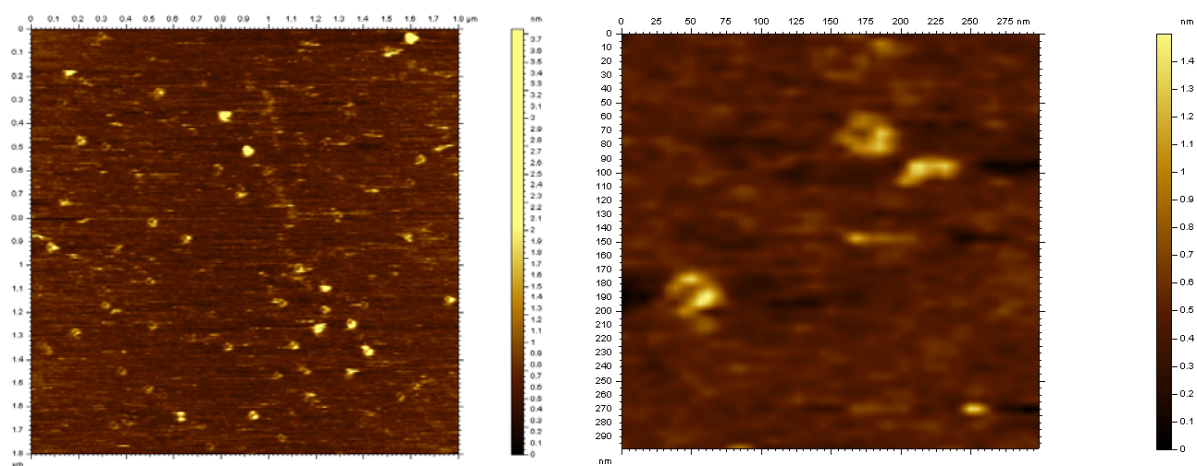

Terpyridine system **2t•3t** in the absence of Zn(II)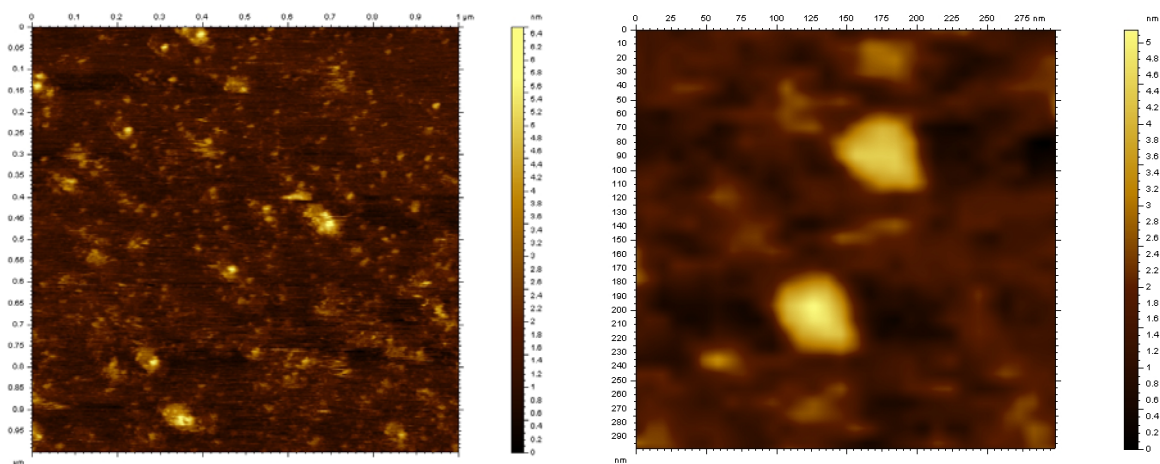Terpyridine system **2t•3t** in the presence of Zn(II)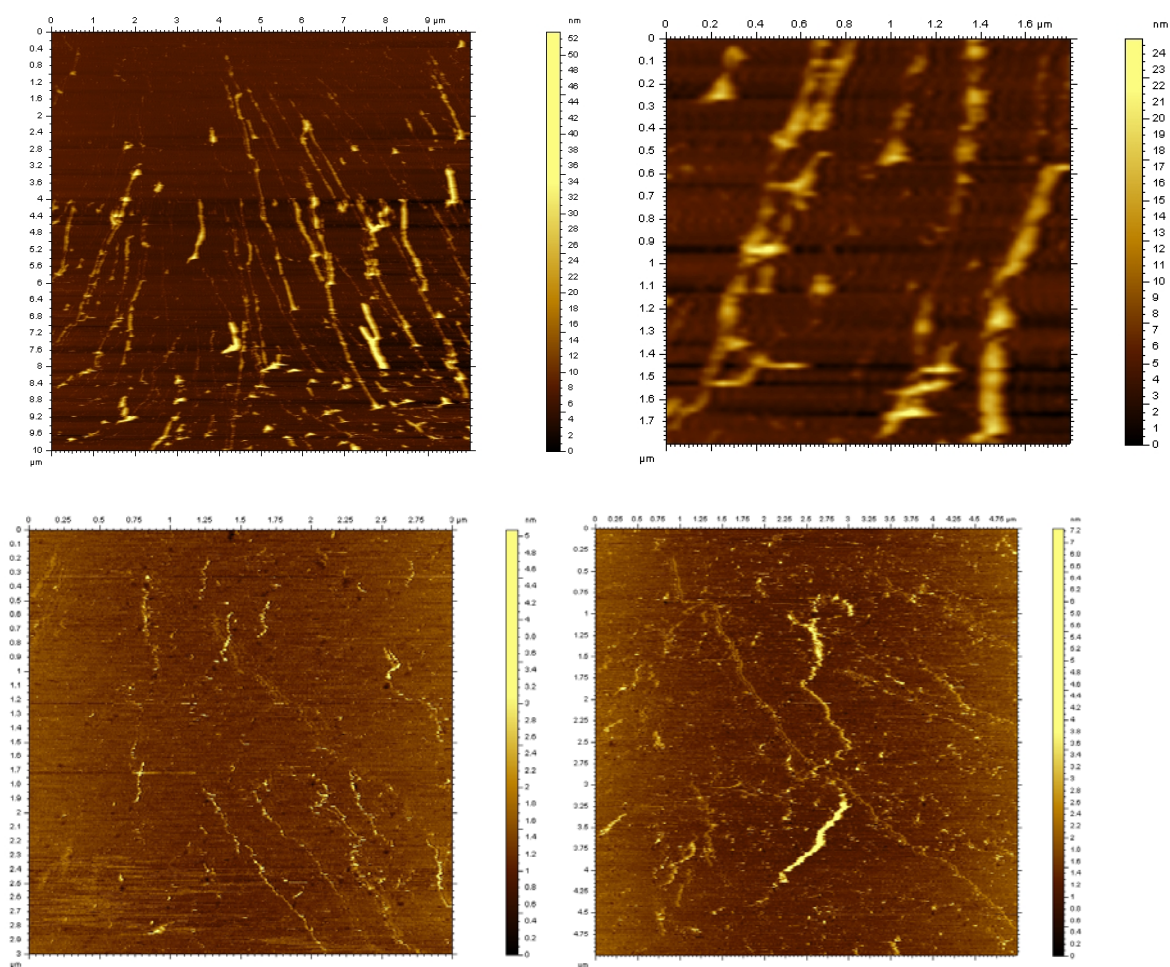

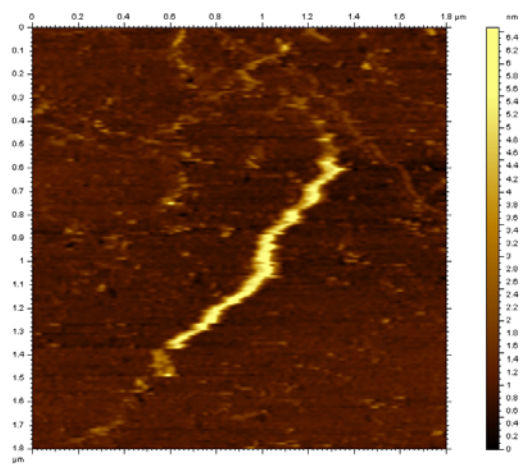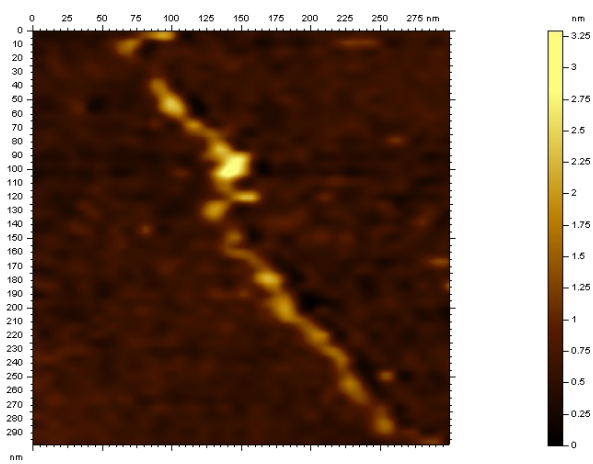

Supplement: molecules-16-04912-s001.pdf [file molecules-16-04912-s001.pdf]
